# Supplementary material for: Distinct microbiotas of anatomical gut regions display idiosyncratic seasonal variation in an avian folivore
Source: PubMed Central journal article supplement (PMC7803122; doi:10.1186/s42523-019-0002-6), 2019-02-05

**Methanogram**

unclassified Mollicutes RF9 unclassified Thermoplasmatales  
**unclassified Synergistaceae** *Actinomyces*

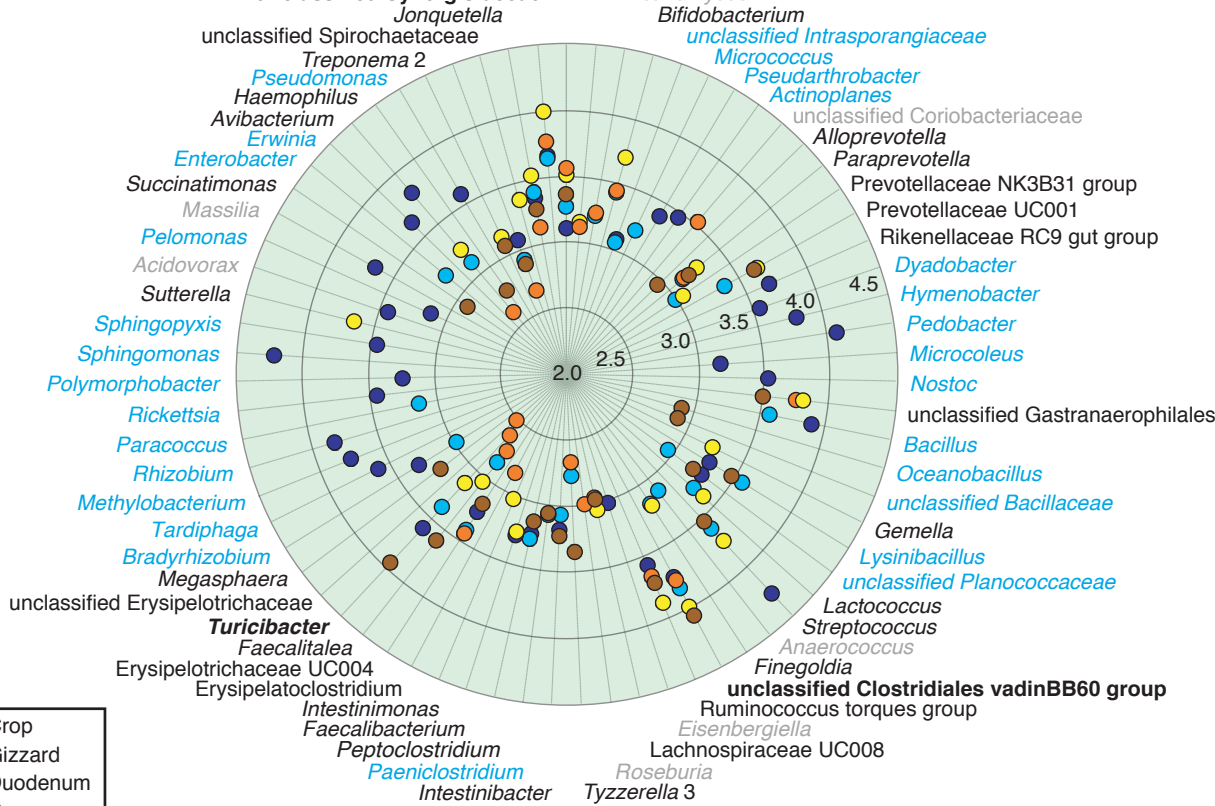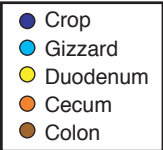

unclassified Mycoplasmataceae unclassified Actinomycetaceae

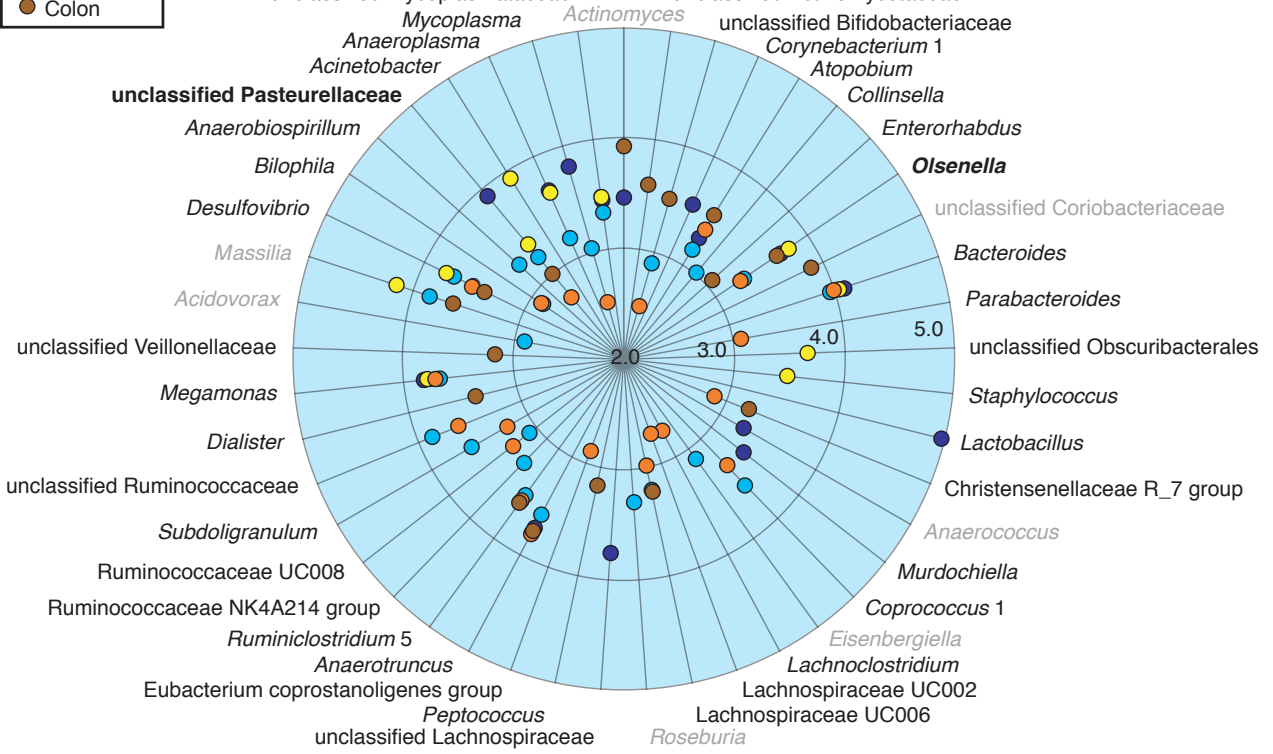

Supplement: 42523_2019_2_MOESM9_ESM.pdf [file 42523_2019_2_MOESM9_ESM.pdf]
