# Supplementary material for: Distinct microbiotas of anatomical gut regions display idiosyncratic seasonal variation in an avian folivore
Source: PubMed Central journal article supplement (PMC7803122; doi:10.1186/s42523-019-0002-6), 2019-02-05
Supplement: 42523_2019_2_MOESM12_ESM.pdf [file 42523_2019_2_MOESM12_ESM.pdf]

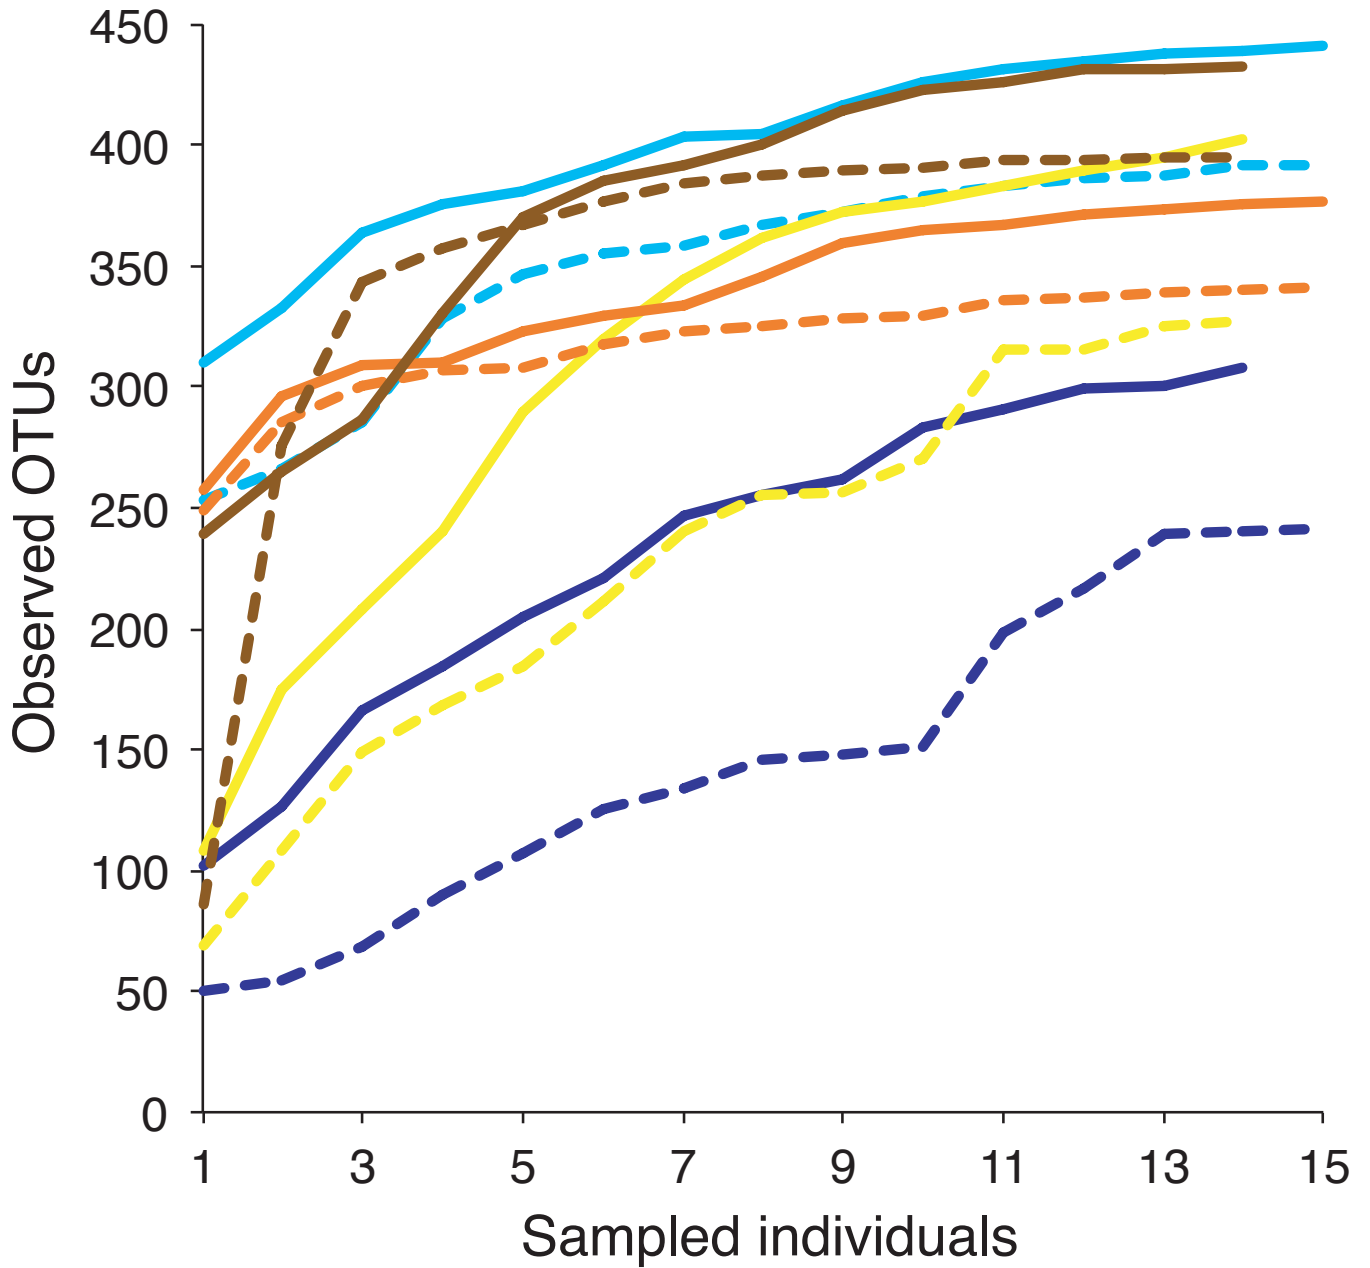

- Crop-Sep
- Crop-Dec
- Ventriculus-Sep
- Ventriculus-Dec
- Cecum-Sep
- Cecum-Dec
- Duodenum-Sep
- Duodenum-Dec
- Colon-Sep
- Colon-Dec
